# Supplementary material for: AC3-symmetric triple oxa[6]helicene with circularly polarized luminescence featuring parallel transition dipole moments
Source: Royal Society of Chemistry journal article supplement (doi:10.1039/d2cc04475g), 2022-01-01
Supplement: d2cc04475g1.pdf [file d2cc04475g1.pdf]

## Supporting Information

### **A $C_3$ -Symmetric Triple Oxa[6]helicene with Circularly Polarized Luminescence Featuring Parallel Transition Dipole Moments**

Jun Liu,<sup>1</sup> Lihui Jiang,<sup>1</sup> Hao Chang,<sup>1</sup> Haoliang Liu,<sup>2</sup> Xiao-Yu Cao,<sup>2</sup> Yingping Zou,<sup>1</sup>  
Yunbin Hu\*<sup>1</sup>

<sup>1</sup>College of Chemistry and Chemical Engineering, Central South University, Changsha 410083,  
China;

<sup>2</sup>Department of Chemistry and Chemical Engineering, Xiamen University, Xiamen 361005, China.

## Contents

|                                                               |            |
|---------------------------------------------------------------|------------|
| <b>1. Experimental Procedures .....</b>                       | <b>S2</b>  |
| <b>2. X-ray Single Crystallography .....</b>                  | <b>S4</b>  |
| <b>3. Photophysical and Electrochemical Properties .....</b>  | <b>S5</b>  |
| <b>4. Optical Resolution and Chiroptical Properties .....</b> | <b>S6</b>  |
| <b>5. Theoretic Calculations.....</b>                         | <b>S9</b>  |
| <b>6. NMR and HRMS Spectra.....</b>                           | <b>S20</b> |

## 1. Experimental Procedures

### General Methods

All starting materials were purchased from Energy Chemical and used as received without further purification. NMR spectra were recorded in CDCl<sub>3</sub> on Bruker AV-400 nuclear magnetic resonance spectrometer. Abbreviations: s=singlet, d = doublet, t = triplet, m = multiplet. X-ray crystallography was performed on a Bruker AXS Kappa ApexII Duo Diffractometer. High resolution mass spectrometry (HRMS) was performed on a SolariX fourier-transform ion cyclotron resonance (FT-ICR) mass spectrometer by matrix-assisted laser desorption/ionization (MALDI). UV-vis absorption spectra were recorded by UV-2600 Spectrophotometer. Fluorescence spectra were determined by HITACHI F-4600 Fluorescence Spectrophotometer. Absolute photoluminescence quantum yields were recorded on Edinburgh FS5 Fluorescence Spectrometer. Fluorescence lifetimes were determined by Edinburgh FLS1000 fluorescence spectrometer. Cyclic voltammetry curves were tested by CHI660E electrochemical workstation and measurements were carried out in dichloromethane containing 0.1 M n-Bu<sub>4</sub>NPF<sub>6</sub> as supporting electrolyte (scan rate: 100 mV s<sup>-1</sup>) using ferrocene as an external reference. A Calomel electrode was used as a working electrode, a platinum wire as a counter electrode and an Ag-AgCl electrode as a reference electrode. Optical resolution was performed on a Shimadzu LC-16A instrument equipped with a DAICEL CHIRALPAK IE column. CD spectra were collected on JASCO J-810 circular dichroism spectrometer at 298 K. CPL spectra were obtained using JASCO CPL-300 spectrophotometer at 298 K (emission slit width: 3000 μm, integration time: 4 sec, scan speed: 100 nm/min and accumulations: 3 times).

### Synthesis

1,3,5-tri(2-bromophenyl)benzene (**1**) was synthesized according to the reported procedure.<sup>1</sup>

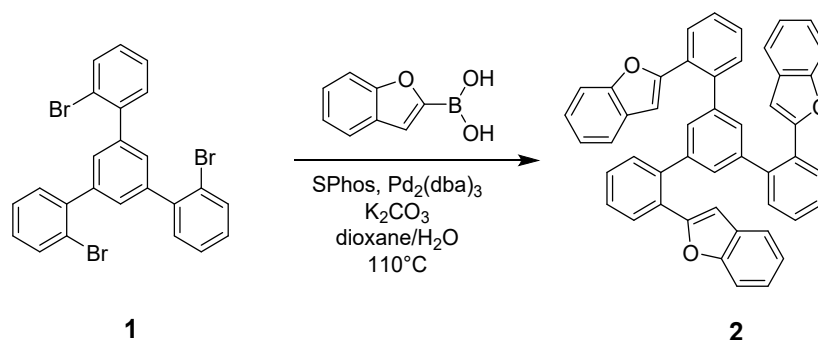

**1,3,5-Tri(2-benzofuranylphenyl) benzene (2)**. Under argon atmosphere, 1,3,5-tri(2-bromophenyl)benzene (**1**, 1.00 g, 1.27 mmol), benzofuran-2-boronic acid (656 mg, 4.05 mmol), tris[dibenzylideneacetone]dipalladium(0) (Pd<sub>2</sub>(dba)<sub>3</sub>, 139 mg, 0.152 mmol), 2-

dicyclohexylphosphino-2',6'-dimethoxybiphenyl (SPhos, 249 mg, 0.608 mmol) and potassium carbonate (2.70 g, 19.7 mmol) were suspended in a degassed solvent mixture of dioxane (48 mL) and water (12 mL). The resulting suspension was heated to 110 °C and stirred for 12 hours. After cooled to room temperature, the reaction mixture was diluted with water and extracted with dichloromethane. The organic phase was dried over Na<sub>2</sub>SO<sub>4</sub> and evaporated to dryness. The residue was purified via column chromatography with dichloromethane/petroleum ether (1/3) as eluent to afford **2** as white powder (621 mg, 75%). <sup>1</sup>H NMR (400 MHz, CDCl<sub>3</sub>, 298K, ppm) δ 7.89 (dd, *J* = 7.8, 0.9 Hz, 3H), 7.44–7.35 (m, 9H), 7.34 (s, 3H), 7.26–7.21 (m, 6H), 7.17–7.13 (m, 3H), 7.04 (dd, *J* = 7.6, 0.9 Hz, 3H), 6.43 (s, 3H); <sup>13</sup>C NMR (100 MHz, CDCl<sub>3</sub>, 298 K, ppm) δ 155.25, 154.41, 141.91, 140.07, 131.01, 129.06, 129.02, 129.01, 128.58, 128.38, 127.73, 124.28, 122.89, 120.91, 111.15, 105.88. HRMS (MALDI-FT) *m/z*: Calcd for C<sub>48</sub>H<sub>30</sub>O<sub>3</sub>: 654.2195; Found: 654.2189 (M<sup>+</sup>).

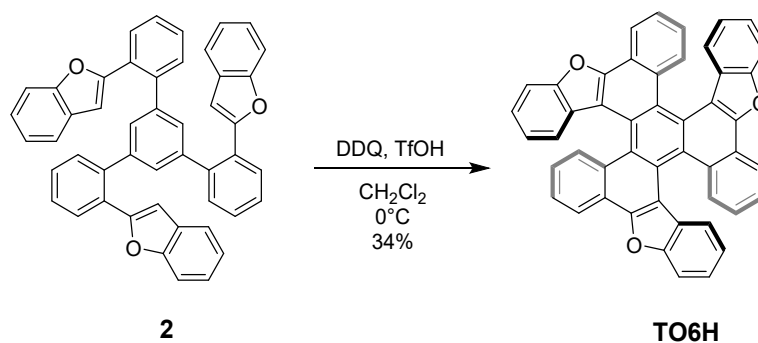

**Triple oxa[6]helicene (TO6H).** Under argon atmosphere, compound **2** (500mg, 0.764 mmol) and 2,3-dichloro-5,6-dicyano-1,4-benzoquinone (DDQ, 572 mg, 2.52 mmol) were dissolved in 250 mL of dry degassed dichloromethane. The resulting solution was cooled to 0 °C and triflic acid (5 mL) was then added dropwise. After further stirred at 0 °C for 2 hours, the reaction mixture was successively neutralized by triethylamine, diluted with dichloromethane, and washed with water. The organic phase was dried over Na<sub>2</sub>SO<sub>4</sub> and evaporated to dryness. The residue was purified via column chromatography with dichloromethane/petroleum ether (1/4) as eluent, affording the crude product as a yellow solid. The crude product was subjected to recrystallization in tetrahydrofuran/methanol, providing pure **TO6H** as a bright yellow powder (170 mg, 34%). <sup>1</sup>H NMR (400 MHz, CDCl<sub>3</sub>, 298K, ppm) δ 8.75 (d, *J* = 7.9 Hz, 3H), 8.38 (d, *J* = 8.4 Hz, 3H), 7.73 (t, *J* = 7.8 Hz, 6H), 7.29 (dd, *J* = 16.0, 7.7 Hz, 6H), 6.84 (t, *J* = 7.6 Hz, 3H), 6.27 (d, *J* = 7.9 Hz, 3H). <sup>13</sup>C NMR (100 MHz, CDCl<sub>3</sub>, 298K, ppm) δ 155.90, 151.23, 131.32, 130.34, 126.79, 126.63, 125.57, 125.33, 125.06, 124.59, 123.33, 121.83, 121.14, 120.62, 117.14, 111.31. HRMS (MALDI-FT) *m/z*: Calcd for C<sub>48</sub>H<sub>30</sub>O<sub>3</sub>: 648.1725; Found: 648.1720 (M<sup>+</sup>).

## 2. X-ray Single Crystallography

Single crystal suitable for X-ray crystallography analysis was obtained by slow diffusion of methanol vapor into the toluene solution of **TO6H** for 3 weeks. The crystal structure was deposited at the Cambridge Crystallographic Data Centre (CCDC) and the data can be obtained free of charge via [www.ccdc.cam.ac.uk/structures](http://www.ccdc.cam.ac.uk/structures).

**Table S1.** Crystal data for **TO6H** (CCDC number: 2171351).

|                                                                                            |                                                                                                                                                                                     |
|--------------------------------------------------------------------------------------------|-------------------------------------------------------------------------------------------------------------------------------------------------------------------------------------|
| formula                                                                                    | C <sub>48</sub> H <sub>24</sub> O <sub>3</sub>                                                                                                                                      |
| molecular weight                                                                           | 648.67 g mol <sup>-1</sup>                                                                                                                                                          |
| absorption                                                                                 | $\mu = 0.086 \text{ mm}^{-1}$                                                                                                                                                       |
| crystal size                                                                               | 0.50 × 0.3 × 0.3 yellow block                                                                                                                                                       |
| space group                                                                                | P-1(monoclinic)                                                                                                                                                                     |
| lattice parameters<br>(calculate from 16522 reflections<br>with 2.35° < $\theta$ < 24.99°) | a = 21.582(12)Å $\alpha = 90^\circ$<br>b = 28.06(2)Å $\beta = 120.061(12)^\circ$<br>c = 11.830(8)Å $\gamma = 90^\circ$<br>v = 6200.51(700)Å <sup>3</sup> z = 8      F(000) = 2688.0 |
| temperature                                                                                | 150 k                                                                                                                                                                               |
| density                                                                                    | $d_{\text{xray}} = 1.38966 \text{ g cm}^{-3}$                                                                                                                                       |
| <u>data collection</u>                                                                     |                                                                                                                                                                                     |
| diffractometer                                                                             | Bruker APEX-II CCD                                                                                                                                                                  |
| radiation                                                                                  | Mo-K $\alpha$ Graphitmonochromator                                                                                                                                                  |
| scan-type                                                                                  | \f and \w scans                                                                                                                                                                     |
| scan-width                                                                                 | 1°                                                                                                                                                                                  |
| scan range                                                                                 | 2.181° ≤ $\theta$ < 28.213°<br>-28° ≤ h ≤ 28°, -37° ≤ k ≤ 37°, -15° ≤ l ≤ 13°                                                                                                       |
| number of reflections:                                                                     |                                                                                                                                                                                     |
| measured                                                                                   | 5988                                                                                                                                                                                |
| unique                                                                                     | 56830 (R <sub>int</sub> = 0.0435)                                                                                                                                                   |
| observed                                                                                   | 7619(I/s(I) > 2)                                                                                                                                                                    |
| <u>Data correction, structure solution and refinement</u>                                  |                                                                                                                                                                                     |
| corrections                                                                                | Bruker APEX2                                                                                                                                                                        |
| structure solution                                                                         | program: SHELXS-97 (sheldrick, 2008)                                                                                                                                                |
| refinement                                                                                 | Program: SHELXS 2014/7 (sheldrick, 2014).<br>refined parameters, weighting scheme:<br>$w = 1/[\sigma^2(F_o^2) + (0.0462P)^2 + 4.7515P]$ where<br>$P = (F_o^2 + 2F_c^2)/3$           |
| R-values                                                                                   | $wR_2 = 0.1017$ (R = 0.0435 for observed reflections,<br>0.0605 for all reflections)                                                                                                |
| goodness of fit                                                                            | S = 1.014                                                                                                                                                                           |

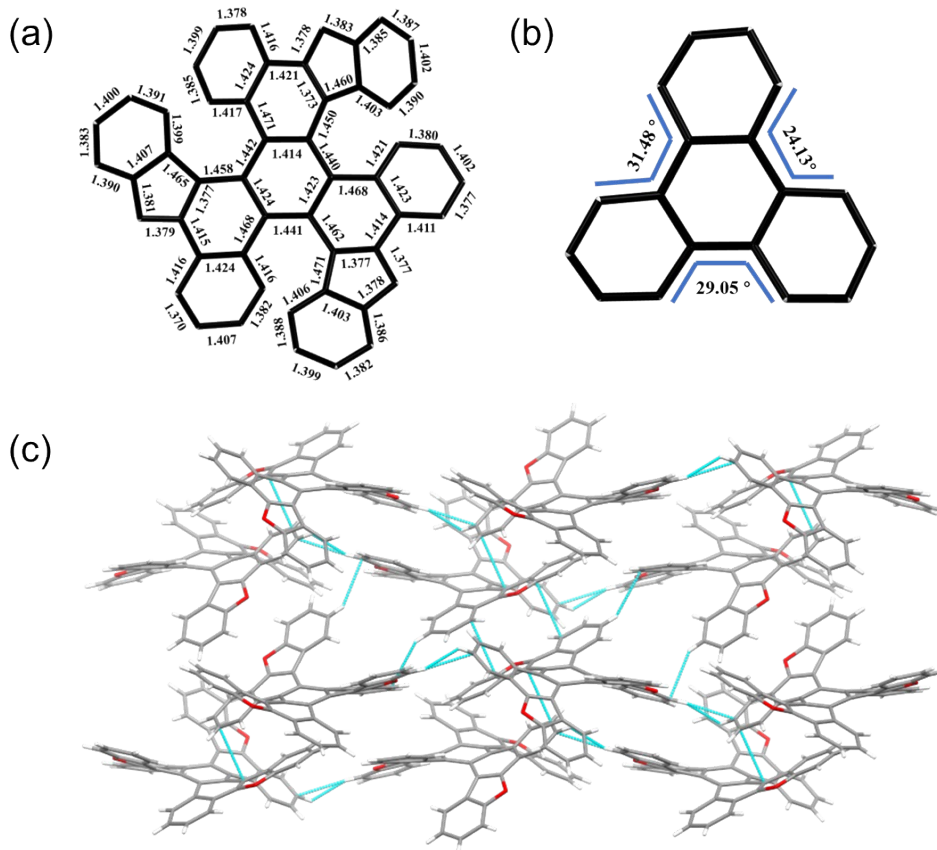

**Figure S1.** (a) the bond lengths and torsion angles (b) of the **TO6H** in the crystal structure. (c) Molecular packing structure of **TO6H** showing short contacts with blue dotted line.

### 3. Photophysical and Electrochemical Properties

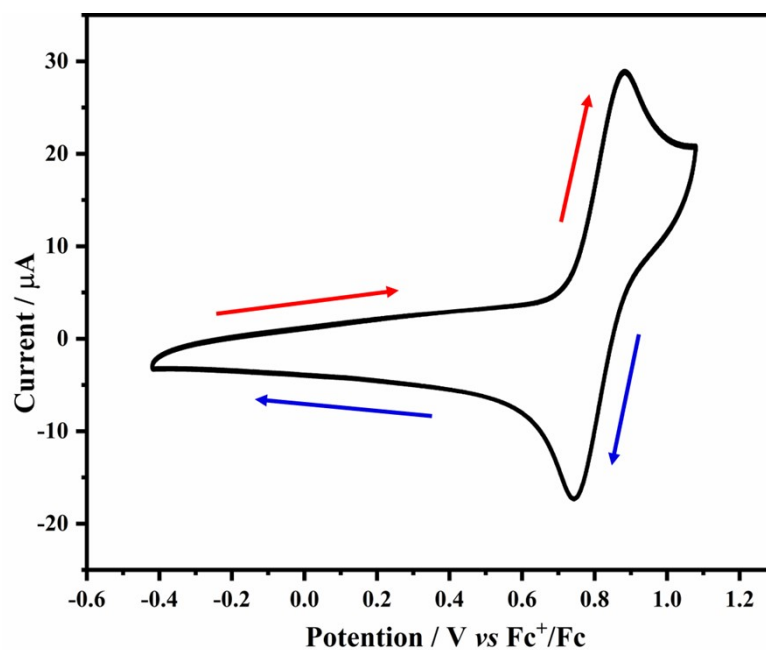

**Figure S2.** Cyclic voltammograms of **TO6H** in dichloromethane ( $c = 10^{-3}$  M) with  $\text{Bu}_4\text{NPF}_6$  ( $c = 0.1$  M) as a supporting electrolyte at a scan rate of  $100 \text{ mV s}^{-1}$ .

**Table S2.** Summary of photophysical properties

| Compound    | $\lambda_{\text{abs}}$<br>(nm) | $\lambda_{\text{em}}$<br>(nm) | Stokes shift<br>( $\text{cm}^{-1}$ ) | $E_{\text{g}}^{\text{opt}}$<br>(eV) <sup>a</sup> | $\Phi_{\text{F}}$ | $\tau_{\text{F}}$ (ns) <sup>b</sup> | $k_{\text{r}}$<br>( $10^8 \text{ s}^{-1}$ ) <sup>c</sup> | $k_{\text{nr}}$<br>( $10^8 \text{ s}^{-1}$ ) <sup>d</sup> |
|-------------|--------------------------------|-------------------------------|--------------------------------------|--------------------------------------------------|-------------------|-------------------------------------|----------------------------------------------------------|-----------------------------------------------------------|
| <b>TO6H</b> | 365                            | 490                           | 6989                                 | 2.9                                              | 5%                | 5.8                                 | 0.084                                                    | 1.62                                                      |

<sup>a</sup>Optical band gaps calculated from the onset absorptions:  $E_{\text{g}}^{\text{opt}} = 1240/\lambda_{\text{abs,onset}}$ . <sup>b</sup>Fluorescence lifetimes determined by the fluorescence decay profiles. <sup>c</sup>Radiative decay rate constants calculated by  $\Phi_{\text{F}} = k_{\text{r}} \times \tau_{\text{F}}$ . <sup>d</sup>Nonradiative rate constants calculated by  $k_{\text{r}} + k_{\text{nr}} = \tau_{\text{F}}^{-1}$ .

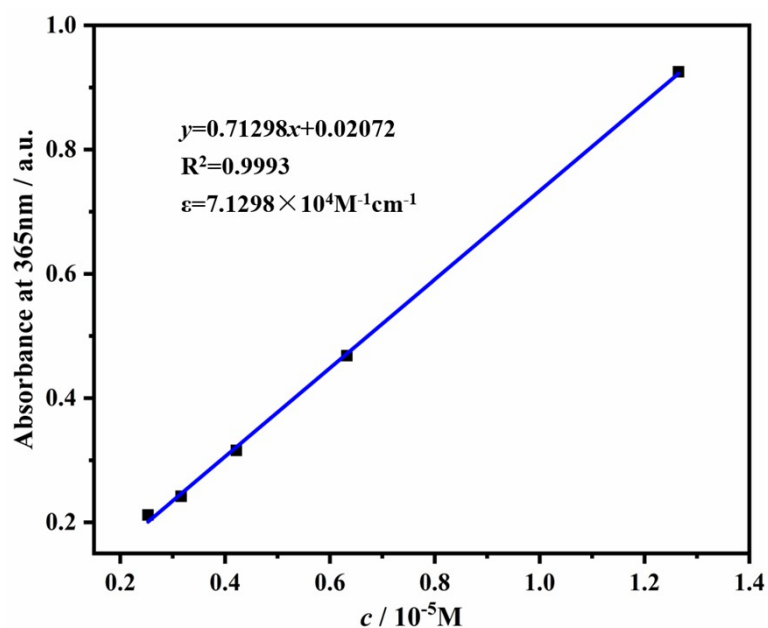**Figure S3.** Calibration plot of the absorption molar extinction coefficients  $\epsilon$ . (298K,  $L = 1\text{cm}$ )

#### 4. Chiral HPLC analysis and Chiroptical Properties

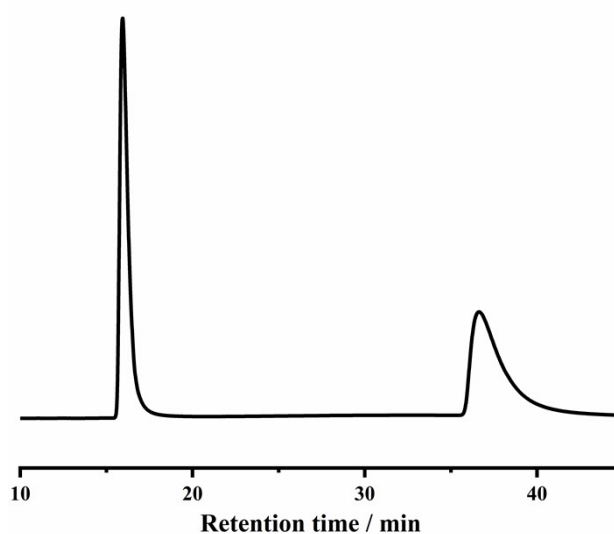**Figure S4.** Chiral HPLC trace during the separation of compound **TO6H** using dichloromethane / n-hexane (1/4, v/v) as eluent.

To determine the racemization barrier, the interconversion process from  $(P,P,P)$ -**TO6H** to  $(P,P,P)$ -**TO6H** was monitored by chiral HPLC.  $(P,P,P)$ -**TO6H** is configurationally stable and no racemization was observed after 24 h at room temperature. Thus, the racemization process during the resolution by HPLC can be neglected. Enantiopure sample of  $(P,P,P)$ -**TO6H** was dissolved in 1, 2-dichlorobenzene and heated at 453 K. Aliquots were periodically removed from the solution and analyzed by chiral HPLC.<sup>2</sup>

The isomerization is a reversible unimolecular reaction and follows first-order kinetics:

$$v = d(A)/A_0 = kdt$$

where  $A$  denotes the concentration of the  $(P,P,P)$ -**TO6H** and  $A_0$  is the initial concentration thereof.  $k$  denotes the reaction rate constant. Integration of the first-order rate law yields:

$$\ln(A/A_0) = -k \cdot t$$

Half-life  $t_{1/2}$  can be calculated from the following equation:

$$t_{1/2} = \ln 2 / k$$

The free activation enthalpy of enantiomerization is determined from the Eyring equation<sup>3</sup>:

$$\Delta G^\ddagger = -RT \ln(hk/\sigma k_B T)$$

Where  $R$ ,  $T$ ,  $h$ ,  $k$ ,  $k_B$  are gas constant, absolute temperature, Planck's constant, rate constant, and Boltzmann constant, respectively. Parameter  $\sigma$  was assumed as 0.5, as the probability of conversion to  $(P,P,P)$ - or  $(M,M,M)$ -enantiomer is equal.

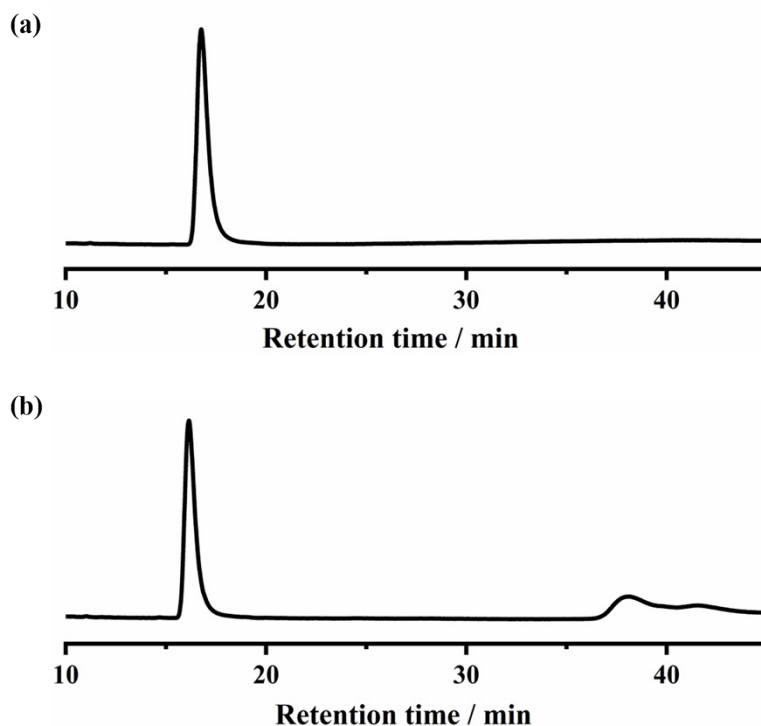

**Figure S5.** HPLC analysis of the thermal racemization progress of  $(P,P,P)$ -**TO6H** rich solution after heating at 453K in 1, 2-dichlorobenzene for (a) 0 s and (b) 4000 s

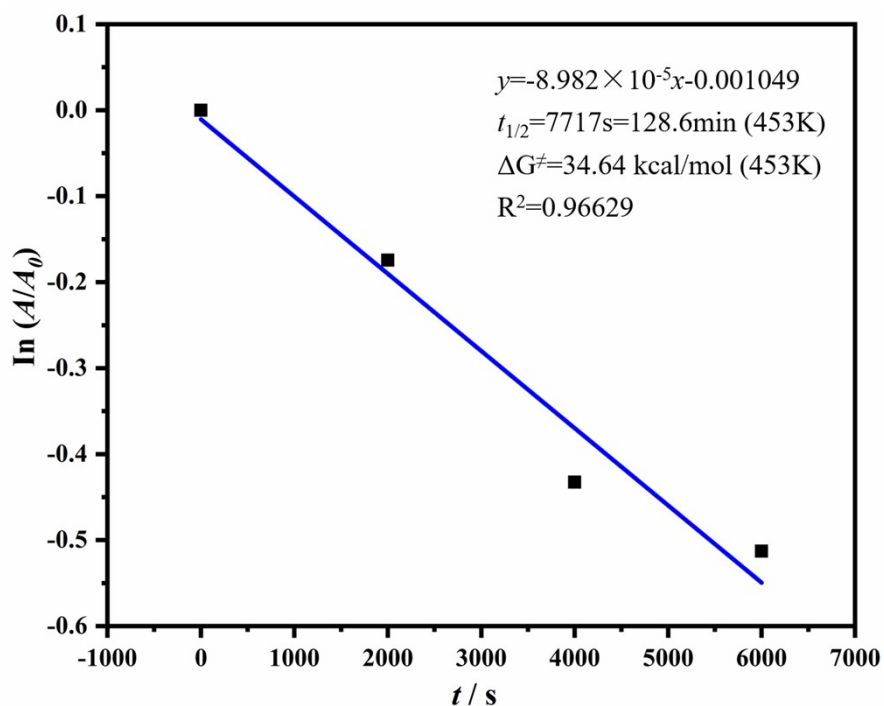

**Figure S6.** Plot of  $\ln(A/A_0)$  vs. time for  $(P,P,P)$ -TO6H at 453 K in 1, 2-dichlorobenzene.

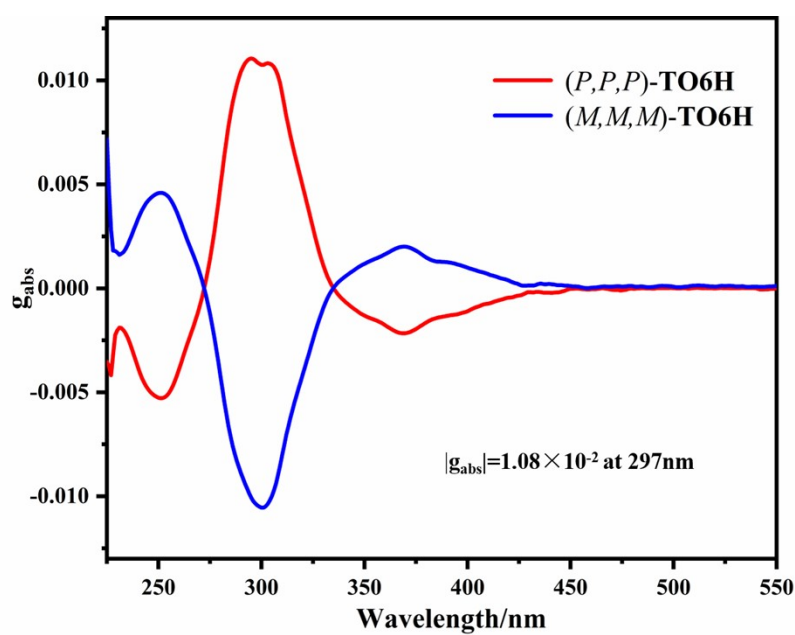

**Figure S7.** The absorption dissymmetry factor curves of TO6H in dichloromethane ( $c = 10^{-5} \text{ M}$ ).



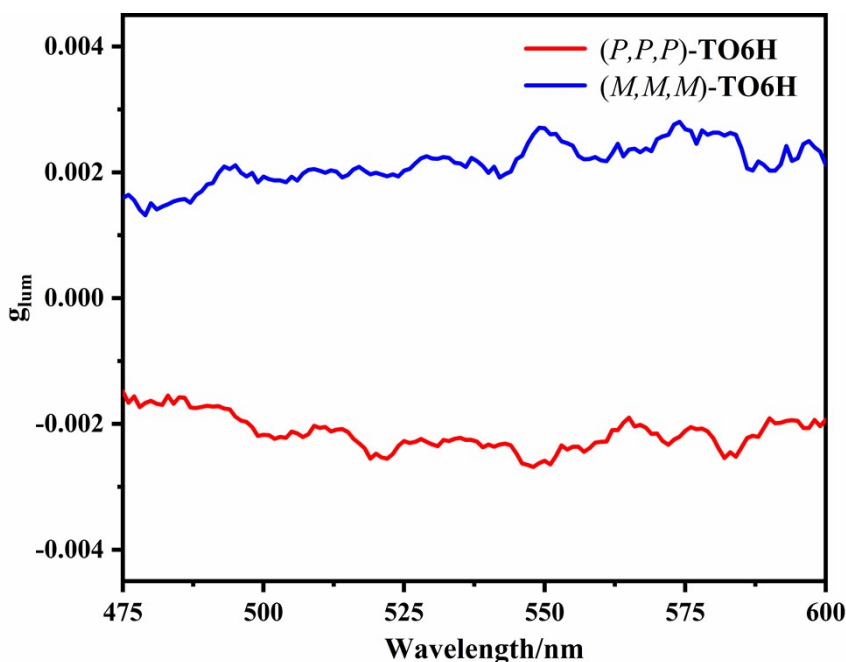

**Figure S8.** Luminescent dissymmetry factor curves of **TO6H** in dichloromethane ( $c = 10^{-5}$  M, 298K, excitation wavelength:365nm)

## 5. Theoretic Calculations

DFT calculations were performed using the Gaussian 16 software package<sup>4</sup>. The ground state ( $S_0$ ) geometry optimization was carried out at the B3LYP/6-311G(d,p) level of theory to obtain the molecular orbitals. The optimized structures were then subjected to time-dependent (TD) DFT calculations at the same level of theory to obtain the excited states and chiroptical parameters which were used to plot the simulated UV-vis absorption and CD spectra. The lowest excited state ( $S_1$ ) geometry optimization was carried out by TD-DFT calculations at the cam-B3LYP/6-311G(d,p) level of theory, which was used to plot the fluorescence spectrum and obtain the chiroptical parameters in the  $S_1$  State.

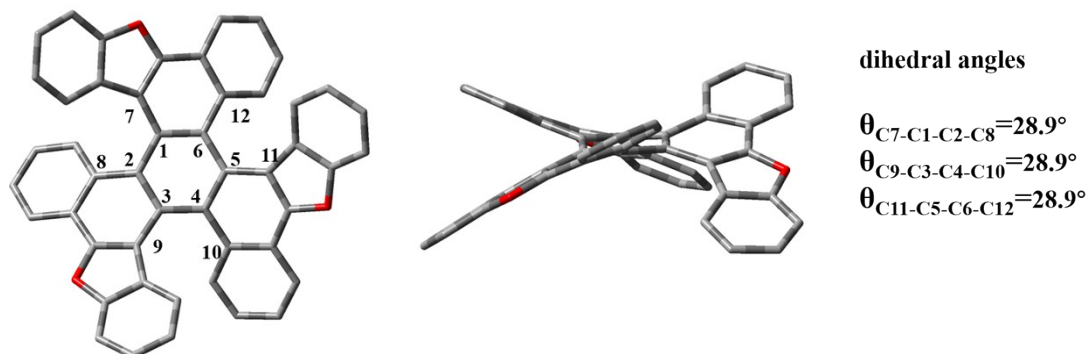

**Figure S9.** Top and side views of the optimized geometry in the ground state of **TO6H**. (All hydrogen atoms are omitted for clarity, and related dihedral angles are listed)

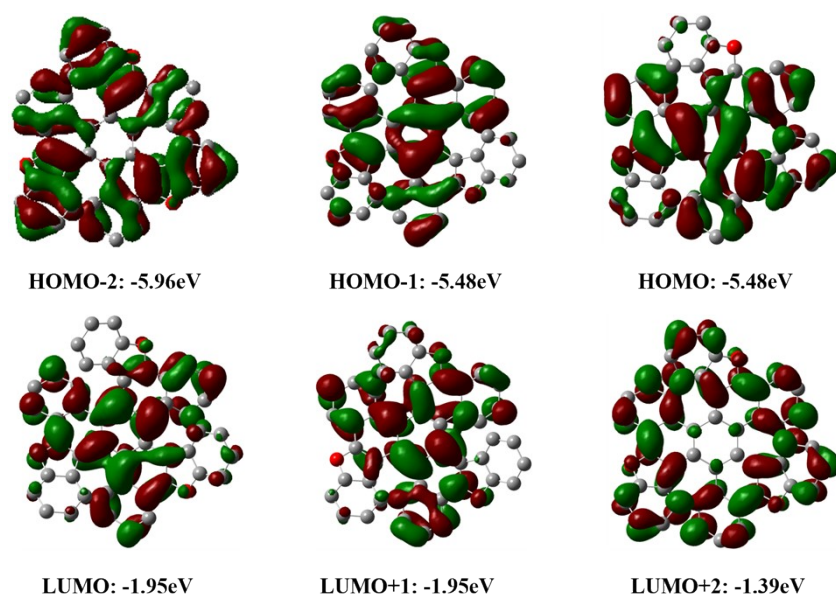

**Figure S10.** The electron density distribution and energies of molecular orbitals for **TO6H**.

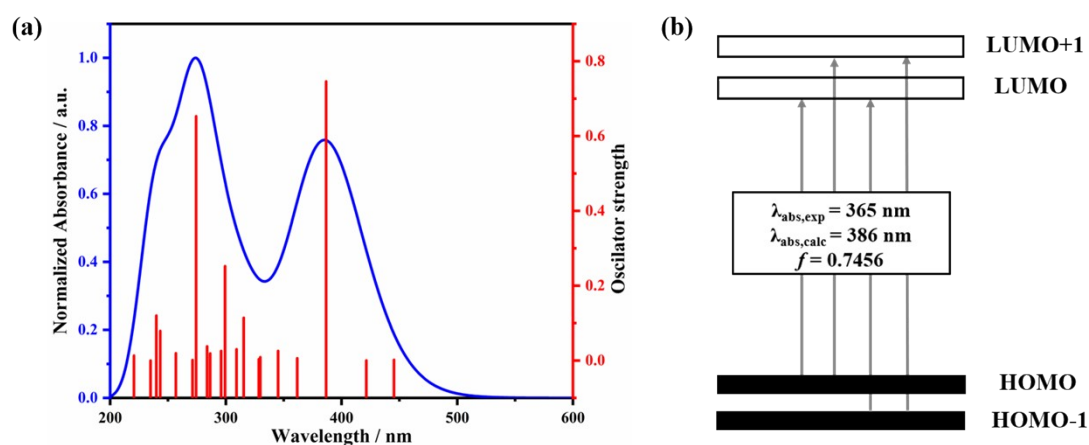

**Figure S11.** (a) Simulated absorption spectrum (blue line) and calculated oscillator strength (red bar) of **TO6H** at the B3LYP/6-311G (d, p) level. (b) Vertical transitions assigned to the experimental absorption band at 365 nm.

**Figure S12.** (a) Simulated fluorescence spectra and calculated oscillator strength (red bar) of **TO6H** at the cam-B3LYP/6-311G (d, p) level. (b) Vertical transitions assigned to the experimental fluorescence band at 490 nm.

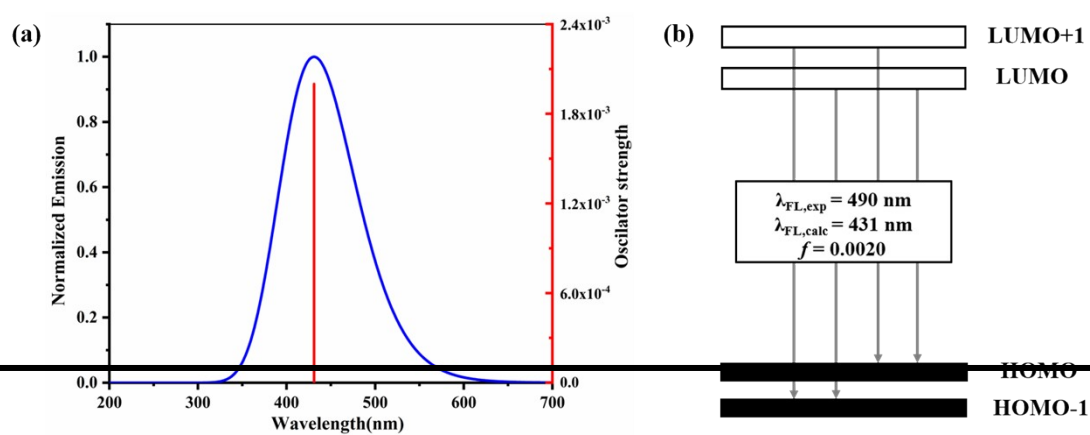

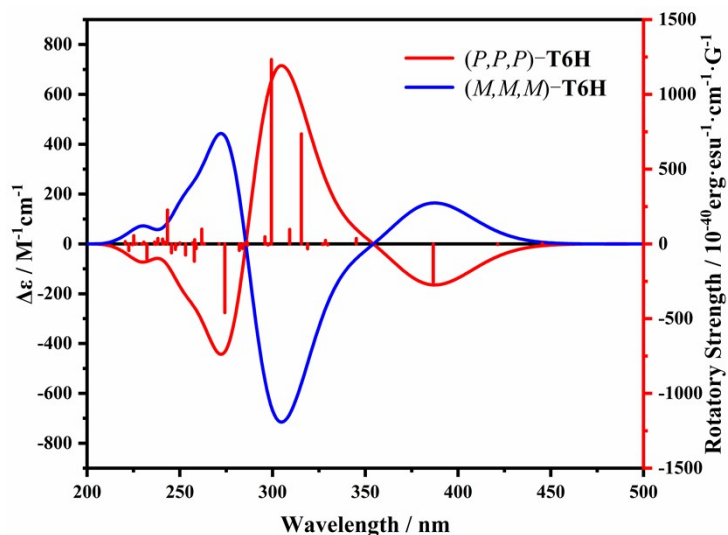

**Figure S13.** Simulated CD spectra and calculated rotatory strength (red bar) for the isomers of **TO6H** at the B3LYP/6-311G (d, p) level.

**Table S3.** Excited states of **TO6H** calculated by TD-DFT at the B3LYP/6-311G (d, p) level for the geometry optimized in the  $S_0$  state (H represents HOMO, and L represents LUMO).

| excited state  | energy (eV) | wavelength (nm) | oscillator strength ( $f$ ) | description       |
|----------------|-------------|-----------------|-----------------------------|-------------------|
| S <sub>1</sub> | 2.7839      | 445.36          | 0.0020                      | H-1→L(0.19401)    |
|                |             |                 |                             | H-1→L+1(-0.45548) |
|                |             |                 |                             | H→L(0.45557)      |
|                |             |                 |                             | H→L+1(0.19403)    |
| S <sub>2</sub> | 2.9422      | 421.40          | 0.0001                      | H-1→L(0.45750)    |
|                |             |                 |                             | H-1→L+1(0.19377)  |
|                |             |                 |                             | H→L(-0.19387)     |
|                |             |                 |                             | H→L+1(0.45750)    |
| S <sub>3</sub> | 3.2067      | 386.64          | 0.7462                      | H-1→L(-0.22935)   |
|                |             |                 |                             | H-1→L+1(0.43389)  |
|                |             |                 |                             | H→L(0.22941)      |
|                |             |                 |                             | H→L+1(0.45750)    |
| S <sub>4</sub> | 3.2068      | 386.63          | 0.7456                      | H-1→L(0.43384)    |
|                |             |                 |                             | H-1→L+1(0.22938)  |
|                |             |                 |                             | H→L(0.22935)      |
|                |             |                 |                             | H→L+1(-0.43380)   |
| S <sub>5</sub> | 3.4275      | 361.73          | 0.0061                      | H-2→L(0.59701)    |
|                |             |                 |                             | H-2→L+1(-0.19858) |
|                |             |                 |                             | H-1→L+2(-0.18480) |
|                |             |                 |                             | H→L+2(0.20761)    |
| S <sub>6</sub> | 3.4275      | 361.73          | 0.0060                      | H-2→L(0.19859)    |
|                |             |                 |                             | H-2→L+1(0.59700)  |
|                |             |                 |                             | H-1→L+2(-0.20755) |
|                |             |                 |                             | H→L+2(-0.18489)   |
| S <sub>7</sub> | 3.5920      | 345.17          | 0.0256                      | H-2→L(-0.15093)   |
|                |             |                 |                             | H-2→L+1(0.24175)  |

|                 |        |        |        |                   |
|-----------------|--------|--------|--------|-------------------|
| S <sub>8</sub>  | 3.5920 | 345.16 | 0.0257 | H→L+2(0.60476)    |
|                 |        |        |        | H-2→L(0.24163)    |
|                 |        |        |        | H-2→L+1(0.15090)  |
|                 |        |        |        | H-1→L+2(0.60486)  |
|                 |        |        |        | H-4→L(-0.10493)   |
| S <sub>9</sub>  | 3.7598 | 329.76 | 0.0089 | H-4→L+1(0.26401)  |
|                 |        |        |        | H-3→L(-0.26289)   |
|                 |        |        |        | H-3→L+1(-0.10397) |
|                 |        |        |        | H-1→L+2(-0.14997) |
|                 |        |        |        | H-1→L+4(0.38504)  |
| S <sub>10</sub> | 3.7599 | 329.75 | 0.0089 | H→L+3(0.38778)    |
|                 |        |        |        | H-4→L(0.26354)    |
|                 |        |        |        | H-4→L+1(0.10405)  |
|                 |        |        |        | H-3→L(-0.10444)   |
|                 |        |        |        | H-3→L+1(0.26322)  |
|                 |        |        |        | H-1→L+3(0.38691)  |
|                 |        |        |        | H→L+2(-0.15009)   |
|                 |        |        |        | H→L+4(-0.38608)   |

**Table S4.** Excited states of **TO6H** calculated at the cam-B3LYP/6-311G (d, p) level for the geometry optimized in the S<sub>1</sub> state (H represents HOMO, and L represents LUMO).

| excited state  | energy (eV) | wavelength (nm) | oscillator strength ( <i>f</i> ) | description       |
|----------------|-------------|-----------------|----------------------------------|-------------------|
| S <sub>1</sub> | 2.8765      | 431.02          | 0.0020                           | H-1→L(-0.24913)   |
|                |             |                 |                                  | H-1→L+1(0.41099)  |
|                |             |                 |                                  | H→L(0.41109)      |
|                |             |                 |                                  | H→L+1(0.24911)    |
| S <sub>2</sub> | 3.1053      | 399,27          | 0.0005                           | H-1→L+1(0.25132)  |
|                |             |                 |                                  | H→L(0.25144)      |
|                |             |                 |                                  | H-1→L(0.41539)    |
|                |             |                 |                                  | H→L+1(-0.41533)   |
| S <sub>3</sub> | 3.5603      | 348.24          | 0.7900                           | H-1→L+1(-0.43627) |
|                |             |                 |                                  | H→L(0.43614)      |
|                |             |                 |                                  | H→L+1(-0.20608)   |
|                |             |                 |                                  | H-1→L(-0.20609)   |

**Table S5.** Chiroptical parameters of (*P,P,P*)-**TO6H** calculated by TD-DFT at B3LYP/6-311G (d, p) level of theory for the geometry optimized in S<sub>0</sub> state.

| excited state  | $ \mu $ (10 <sup>-20</sup> esu·cm) | $ m $ (10 <sup>-20</sup> erg/Gauss) | cosθ     | $g_{\text{abs,cal}}$ | wavelength (nm) |
|----------------|------------------------------------|-------------------------------------|----------|----------------------|-----------------|
| S <sub>1</sub> | 43.11242                           | 0.17788                             | 1        | 0.0165               | 445.36          |
| S <sub>2</sub> | 8.0381                             | 0.55069                             | -0.99992 | -0.27274             | 421.40          |
| S <sub>3</sub> | 783.90437                          | 1.06215                             | -0.61233 | -0.00332             | 386.64          |
| S <sub>4</sub> | 783.54148                          | 1.06132                             | -0.61255 | -0.00332             | 386.63          |
| S <sub>5</sub> | 68.27975                           | 0.40025                             | 0.36065  | 0.00846              | 361.73          |
| S <sub>6</sub> | 67.78065                           | 0.40097                             | 0.35413  | 0.00838              | 361.73          |
| S <sub>7</sub> | 137.30985                          | 1.05213                             | 0.44722  | 0.01371              | 345.17          |
| S <sub>8</sub> | 137.34087                          | 1.05228                             | 0.44683  | 0.01369              | 345.16          |

|                 |          |         |          |          |        |
|-----------------|----------|---------|----------|----------|--------|
| S <sub>9</sub>  | 78.9325  | 0.17667 | -0.88096 | -0.00789 | 329.76 |
| S <sub>10</sub> | 78.92073 | 0.17718 | -0.88400 | -0.00794 | 329.75 |

$\mu$ : transition electric dipole moments.

$m$ : transition magnetic dipole moments.

$\theta$ : angle between  $\mu$  and  $m$ .

$g_{\text{abs,cal}}$ : absorption dissymmetry factor calculated by  $g_{\text{abs,cal}} = 4\cos\theta|\mu||m|/(|\mu|^2+|m|^2)$ .

**Table S6.** Chiroptical parameters of (*P,P,P*)-**TO6H** calculated at cam-B3LYP/6-311G(d,p) level of theory for the geometry optimized in S<sub>1</sub> state.

| compound    | $ \mu $<br>(10 <sup>-20</sup> esu·cm) | $ m $<br>(10 <sup>-20</sup> erg/Gauss) | cos $\theta$ | $g_{\text{lum,cal}}$ | wavelength<br>(nm) |
|-------------|---------------------------------------|----------------------------------------|--------------|----------------------|--------------------|
| <b>TO6H</b> | 42.40024                              | 0.03116                                | -1           | 0.00294              | 431.02             |

$\mu$ : transition electric dipole moments.

$m$ : transition magnetic dipole moments

$\theta$ : angle between  $\mu$  and  $m$ .

$g_{\text{lum,cal}}$ : luminescence dissymmetry factor calculated by  $g_{\text{lum,cal}} = 4\cos\theta|\mu||m|/(|\mu|^2+|m|^2)$ .

The cartesian coordinates of the optimized structure was listed as follows:

**(*P,P,P*)-TO6H**

|   | X        | Y        | Z        |   | X        | Y        | Z        |
|---|----------|----------|----------|---|----------|----------|----------|
| O | 1.257457 | 4.760837 | 0.318795 | C | 1.226657 | 0.727186 | -0.49782 |
| O | 3.494458 | -3.46941 | 0.3185   | C | -0.00525 | 1.419735 | -0.36895 |
| O | -4.75189 | -1.29137 | 0.318428 | C | -1.24315 | 0.698685 | -0.49798 |
| C | 0.00659  | 4.928765 | 0.85907  | C | -2.49528 | 1.351855 | -0.88012 |
| C | -0.42105 | 6.074132 | 1.509597 | C | -2.535   | 2.586806 | -1.56719 |
| H | 0.222037 | 6.941279 | 1.590481 | H | -1.61057 | 3.092325 | -1.80581 |
| C | -1.69705 | 6.03832  | 2.063763 | C | -3.72974 | 3.149859 | -1.97172 |
| H | -2.07633 | 6.908156 | 2.587198 | H | -3.71853 | 4.092277 | -2.50707 |
| C | -2.48897 | 4.88555  | 1.966958 | C | -4.95217 | 2.511572 | -1.70584 |
| H | -3.47181 | 4.877423 | 2.423617 | H | -5.88456 | 2.970471 | -2.0137  |
| C | -2.04364 | 3.751395 | 1.297362 | C | -4.95531 | 1.280036 | -1.08586 |
| H | -2.6736  | 2.875619 | 1.240773 | H | -5.88018 | 0.744771 | -0.9093  |
| C | -0.77049 | 3.765369 | 0.709234 | C | 3.646216 | -1.21545 | 0.709142 |
| C | 0.085403 | 2.819538 | -0.00266 | C | -3.73961 | 0.678996 | -0.70381 |
| C | 1.29016  | 3.477292 | -0.14963 | C | -3.6566  | -0.62134 | -0.14995 |
| C | 2.457873 | 2.899047 | -0.70334 | C | -2.48461 | -1.3358  | -0.00274 |
| C | 3.58633  | 3.651346 | -1.08513 | C | -1.22699 | -0.71445 | -0.36901 |
| H | 3.585226 | 4.719918 | -0.90847 | C | 0.016425 | -1.42598 | -0.49785 |
| C | 4.651367 | 3.032886 | -1.70503 | C | 1.23214  | -0.7054  | -0.3689  |
| H | 5.515037 | 3.610916 | -2.01271 | C | 2.399088 | -1.4838  | -0.00262 |
| C | 4.592907 | 1.655128 | -1.97109 | C | 2.366381 | -2.85601 | -0.14963 |
| H | 5.403502 | 1.174232 | -2.5064  | C | 1.281743 | -3.57817 | -0.70329 |
| C | 3.507848 | 0.901972 | -1.56678 | C | 1.369072 | -4.93159 | -1.0851  |
| H | 3.483441 | -0.15135 | -1.8055  | H | 2.295054 | -5.46489 | -0.90844 |
| C | 2.418417 | 1.48501  | -0.87978 | C | 0.300984 | -5.54473 | -1.70503 |

|   | X        | Y        | Z        |   | X        | Y        | Z        |
|---|----------|----------|----------|---|----------|----------|----------|
| H | 0.369766 | -6.5817  | -2.01273 | H | -4.94489 | -5.25176 | 2.58754  |
| C | -0.86298 | -4.80524 | -1.97108 | C | -5.05012 | -3.40144 | 1.509567 |
| H | -1.68473 | -5.2668  | -2.50641 | H | -6.12264 | -3.27804 | 1.590338 |
| C | -0.97274 | -3.48898 | -1.56673 | C | 4.265383 | -2.47007 | 0.858657 |
| H | -1.87272 | -2.94119 | -1.80551 | C | 5.471315 | -2.67235 | 1.508843 |
| C | 0.076865 | -2.83701 | -0.87972 | H | 5.900878 | -3.66282 | 1.589474 |
| C | -4.27196 | -2.45853 | 0.858942 | C | 6.078298 | -1.5494  | 2.063017 |
| C | -2.87587 | -2.54984 | 0.709272 | H | 7.021394 | -1.6558  | 2.586184 |
| C | -2.22728 | -3.64539 | 1.297568 | C | 5.475717 | -0.28726 | 1.966597 |
| H | -1.15386 | -3.75312 | 1.241038 | H | 5.960076 | 0.567974 | 2.423271 |
| C | -2.98688 | -4.59799 | 1.967282 | C | 4.270638 | -0.10592 | 1.297365 |
| H | -2.48846 | -5.44505 | 2.424062 | H | 3.826917 | 0.877428 | 1.241178 |
| C | -4.38117 | -4.48848 | 2.063996 |   |          |          |          |

**TS-1**

|   | X        | Y        | Z        |   | X        | Y        | Z        |
|---|----------|----------|----------|---|----------|----------|----------|
| O | -0.90399 | 4.548102 | 1.412028 | C | -1.28292 | 0.326802 | -0.80248 |
| O | 4.366053 | -1.83808 | 1.065557 | C | -2.54975 | 0.523184 | -1.48523 |
| O | -4.01654 | -2.69633 | -0.56025 | C | -2.86362 | 1.718804 | -2.16792 |
| C | -2.199   | 4.103549 | 1.513038 | H | -2.16004 | 2.540592 | -2.14862 |
| C | -3.1945  | 4.760547 | 2.215709 | C | -4.04239 | 1.845355 | -2.87736 |
| H | -2.99726 | 5.706854 | 2.70323  | H | -4.25439 | 2.770617 | -3.4006  |
| C | -4.4359  | 4.135202 | 2.274491 | C | -4.96275 | 0.785098 | -2.93338 |
| H | -5.24809 | 4.607159 | 2.814878 | H | -5.88754 | 0.899217 | -3.48707 |
| C | -4.63906 | 2.89529  | 1.654841 | C | -4.67907 | -0.40735 | -2.29805 |
| H | -5.60914 | 2.417592 | 1.728443 | H | -5.36905 | -1.24111 | -2.34188 |
| C | -3.62592 | 2.259267 | 0.945485 | C | 4.370693 | -0.01209 | -0.31267 |
| H | -3.81853 | 1.302315 | 0.486233 | C | -3.47179 | -0.55652 | -1.59025 |
| C | -2.36808 | 2.873712 | 0.847865 | C | -3.10248 | -1.72843 | -0.88037 |
| C | -1.05469 | 2.564591 | 0.276423 | C | -1.85646 | -1.96185 | -0.33233 |
| C | -0.24247 | 3.594376 | 0.696858 | C | -0.80486 | -0.9698  | -0.53789 |
| C | 1.131887 | 3.681806 | 0.388496 | C | 0.611696 | -1.17493 | -0.4216  |
| C | 1.880911 | 4.860935 | 0.567579 | C | 1.537122 | -0.07407 | -0.41561 |
| H | 1.416458 | 5.697752 | 1.074473 | C | 2.957595 | -0.4539  | -0.13177 |
| C | 3.158381 | 4.9589   | 0.054968 | C | 3.114472 | -1.64836 | 0.564283 |
| H | 3.732048 | 5.869379 | 0.183182 | C | 2.276136 | -2.78703 | 0.408836 |
| C | 3.673484 | 3.894087 | -0.69645 | C | 2.724267 | -4.09685 | 0.6679   |
| H | 4.633632 | 3.988607 | -1.19061 | H | 3.626389 | -4.24189 | 1.248046 |
| C | 2.947529 | 2.725451 | -0.83033 | C | 2.064381 | -5.16809 | 0.096175 |
| H | 3.286517 | 1.954149 | -1.48515 | H | 2.416767 | -6.17822 | 0.270356 |
| C | 1.703289 | 2.529928 | -0.22729 | C | 0.982464 | -4.93923 | -0.76611 |
| C | 0.958076 | 1.271637 | -0.36401 | H | 0.512789 | -5.77183 | -1.27655 |
| C | -0.45706 | 1.407682 | -0.36142 | C | 0.502352 | -3.65623 | -0.9675  |

|   | X        | Y        | Z        |   | X        | Y        | Z        |
|---|----------|----------|----------|---|----------|----------|----------|
| H | -0.33372 | -3.501   | -1.63453 | H | -5.00749 | -4.86972 | 0.754294 |
| C | 1.095532 | -2.55261 | -0.32746 | C | 5.135909 | -0.85334 | 0.523752 |
| C | -3.37624 | -3.53695 | 0.312997 | C | 6.509407 | -0.79971 | 0.70079  |
| C | -2.0432  | -3.13572 | 0.517989 | H | 6.993915 | -1.46796 | 1.401366 |
| C | -1.29913 | -3.82295 | 1.488587 | C | 7.215169 | 0.080071 | -0.10586 |
| H | -0.28368 | -3.53404 | 1.719575 | H | 8.292932 | 0.151433 | -0.02261 |
| C | -1.88879 | -4.88429 | 2.164491 | C | 6.531128 | 0.814582 | -1.08137 |
| H | -1.31616 | -5.41479 | 2.916327 | H | 7.091103 | 1.422898 | -1.78212 |
| C | -3.20557 | -5.28472 | 1.895159 | C | 5.147936 | 0.76677  | -1.19989 |
| H | -3.63363 | -6.12176 | 2.434276 | H | 4.71529  | 1.296687 | -2.03217 |
| C | -3.97801 | -4.60468 | 0.959301 |   |          |          |          |

**(P,P,M)-TO6H**

|   | X        | Y        | Z        |   | X        | Y        | Z        |
|---|----------|----------|----------|---|----------|----------|----------|
| C | -3.53213 | -1.6221  | 3.16334  | C | 0.245169 | -3.57886 | -0.51335 |
| C | -2.43287 | -1.48669 | 2.338184 | C | -1.97063 | -3.41509 | -0.1367  |
| C | -2.3707  | -0.46042 | 1.36992  | C | -1.60513 | -4.73723 | -0.45509 |
| C | -3.45914 | 0.46083  | 1.316317 | O | -0.25636 | -4.84046 | -0.66946 |
| C | -4.59444 | 0.280778 | 2.130554 | C | -3.3455  | -3.14136 | -0.04651 |
| C | -4.63098 | -0.75339 | 3.043589 | C | -4.25945 | -4.17673 | -0.20886 |
| C | -1.19078 | -0.24815 | 0.549552 | C | -3.84503 | -5.49076 | -0.46101 |
| C | -0.29201 | -1.29361 | 0.120453 | C | -2.49383 | -5.78969 | -0.59782 |
| C | 1.01771  | -0.92568 | -0.27984 | C | -2.37931 | 2.967243 | -1.07349 |
| C | 1.453813 | 0.428308 | -0.00656 | C | -3.7582  | 3.200942 | -0.92738 |
| C | 0.486382 | 1.467785 | 0.053665 | O | -4.30932 | 2.344005 | -0.00528 |
| C | -0.90695 | 1.070283 | 0.116084 | C | -1.67468 | 3.714398 | -2.02615 |
| C | 1.86212  | -1.86445 | -0.99967 | C | -2.3632  | 4.665411 | -2.77067 |
| C | 0.913687 | 2.852039 | 0.272307 | C | -3.73547 | 4.887801 | -2.58271 |
| C | 1.526033 | -3.24756 | -1.01296 | C | -4.46119 | 4.149474 | -1.65163 |
| C | 2.349736 | -4.19325 | -1.66265 | C | 4.030956 | 0.03078  | 0.651771 |
| C | 3.458986 | -3.77547 | -2.36277 | C | 5.032752 | 1.008801 | 0.784268 |
| C | 3.743689 | -2.40119 | -2.45637 | O | 4.536807 | 2.263412 | 0.531172 |
| C | 2.967308 | -1.4738  | -1.79393 | C | 4.362131 | -1.29141 | 0.980638 |
| C | 2.30536  | 3.179331 | 0.254074 | C | 5.660159 | -1.58012 | 1.386501 |
| C | 2.754772 | 4.508992 | 0.407051 | C | 6.641305 | -0.58214 | 1.467217 |
| C | 1.855976 | 5.521985 | 0.648675 | C | 6.336621 | 0.742398 | 1.167918 |
| C | 0.494945 | 5.207225 | 0.793386 | H | -3.54548 | -2.40722 | 3.910409 |
| C | 0.043898 | 3.914185 | 0.621569 | H | -1.59445 | -2.16225 | 2.445898 |
| C | -2.07151 | 1.881596 | -0.15354 | H | -5.41616 | 0.981788 | 2.047824 |
| C | -3.28591 | 1.536431 | 0.410452 | H | -5.49521 | -0.88171 | 3.684974 |
| C | 2.829926 | 0.761948 | 0.253162 | H | 2.065382 | -5.23755 | -1.63712 |
| C | 3.204319 | 2.090647 | 0.268803 | H | 4.086414 | -4.49715 | -2.873   |
| C | -0.71029 | -2.66407 | -0.09977 | H | 4.579062 | -2.06365 | -3.05893 |

|   | X        | Y        | Z        |   | X        | Y        | Z        |
|---|----------|----------|----------|---|----------|----------|----------|
| H | 3.200843 | -0.42434 | -1.89777 | H | -0.61582 | 3.556198 | -2.18151 |
| H | 3.819458 | 4.702372 | 0.371181 | H | -1.82894 | 5.248102 | -3.51201 |
| H | 2.1985   | 6.54302  | 0.770655 | H | -4.24208 | 5.639077 | -3.17714 |
| H | -0.21482 | 5.983562 | 1.055154 | H | -5.52386 | 4.292005 | -1.5019  |
| H | -1.0019  | 3.718034 | 0.782793 | H | 3.625097 | -2.07964 | 0.927226 |
| H | -3.70747 | -2.14112 | 0.12845  | H | 5.918881 | -2.60063 | 1.643725 |
| H | -5.31855 | -3.95705 | -0.14086 | H | 7.64619  | -0.84098 | 1.779865 |
| H | -4.58228 | -6.27706 | -0.57358 | H | 7.067152 | 1.537409 | 1.247219 |
| H | -2.13958 | -6.78525 | -0.83318 |   |          |          |          |

## TS-2

|   | X        | Y        | Z        |   | X        | Y        | Z        |
|---|----------|----------|----------|---|----------|----------|----------|
| O | 3.265111 | 3.642487 | 1.173339 | C | -0.08588 | 2.667763 | -2.16737 |
| O | 1.113433 | -4.69157 | -0.87208 | H | 0.956341 | 2.728209 | -1.89166 |
| O | -4.49118 | 0.930392 | -1.37259 | C | -0.5175  | 3.333421 | -3.29473 |
| C | 2.19611  | 4.491851 | 1.024399 | H | 0.190836 | 3.919139 | -3.8695  |
| C | 2.232299 | 5.85539  | 1.263697 | C | -1.8578  | 3.249127 | -3.71506 |
| H | 3.14958  | 6.344756 | 1.565553 | H | -2.18522 | 3.783475 | -4.59934 |
| C | 1.033927 | 6.547673 | 1.112813 | C | -2.74278 | 2.464439 | -3.01019 |
| H | 1.009696 | 7.616    | 1.293466 | H | -3.77356 | 2.362044 | -3.32448 |
| C | -0.14196 | 5.880248 | 0.742074 | C | 2.436609 | -2.83303 | -1.12031 |
| H | -1.06287 | 6.443234 | 0.644563 | C | -2.30654 | 1.767394 | -1.86411 |
| C | -0.15246 | 4.511877 | 0.494649 | C | -3.15645 | 0.941701 | -1.09679 |
| H | -1.07007 | 4.017713 | 0.209057 | C | -2.80326 | 0.142471 | -0.01459 |
| C | 1.04285  | 3.79206  | 0.626503 | C | -1.35365 | 0.001427 | 0.23387  |
| C | 1.461809 | 2.400998 | 0.504284 | C | -0.61463 | -1.22523 | 0.572822 |
| C | 2.791458 | 2.390043 | 0.88701  | C | 0.766314 | -1.26059 | 0.246821 |
| C | 3.555235 | 1.225253 | 1.119789 | C | 1.292767 | -2.48562 | -0.28594 |
| C | 4.877456 | 1.275312 | 1.615326 | C | 0.539083 | -3.64239 | -0.21334 |
| H | 5.355009 | 2.241022 | 1.724439 | C | -0.65456 | -3.73938 | 0.536581 |
| C | 5.5241   | 0.117652 | 1.981282 | C | -1.23691 | -4.96314 | 0.922843 |
| H | 6.537043 | 0.155202 | 2.365132 | H | -0.82922 | -5.88324 | 0.522229 |
| C | 4.848397 | -1.11315 | 1.890185 | C | -2.26374 | -4.98243 | 1.843796 |
| H | 5.337739 | -2.02211 | 2.220898 | H | -2.69962 | -5.92435 | 2.155616 |
| C | 3.563254 | -1.17901 | 1.395108 | C | -2.68744 | -3.77961 | 2.430564 |
| H | 3.066466 | -2.13684 | 1.362761 | H | -3.41796 | -3.7966  | 3.231374 |
| C | 2.879391 | -0.02215 | 0.945916 | C | -2.15605 | -2.57443 | 2.011846 |
| C | 1.522111 | -0.03829 | 0.425038 | H | -2.40142 | -1.66252 | 2.527687 |
| C | 0.816528 | 1.155928 | 0.207481 | C | -1.18993 | -2.49784 | 0.999151 |
| C | -0.54928 | 1.062315 | -0.27578 | C | -5.07421 | 0.196322 | -0.38595 |
| C | -0.97459 | 1.879881 | -1.39112 | C | -4.11427 | -0.29105 | 0.526771 |



|   | X        | Y        | Z        |   | X        | Y        | Z        |
|---|----------|----------|----------|---|----------|----------|----------|
| C | -4.65367 | -0.84699 | 1.703599 | C | 3.125748 | -4.91576 | -2.24455 |
| H | -4.03672 | -1.1316  | 2.533949 | H | 2.945161 | -5.96162 | -2.45801 |
| C | -6.0267  | -0.99942 | 1.850327 | C | 4.216006 | -4.22632 | -2.76882 |
| H | -6.40704 | -1.43281 | 2.768113 | H | 4.919003 | -4.74835 | -3.40734 |
| C | -6.92519 | -0.59155 | 0.857767 | C | 4.409778 | -2.86573 | -2.49105 |
| H | -7.99062 | -0.73368 | 0.994073 | H | 5.261277 | -2.35284 | -2.92291 |
| C | -6.44743 | 0.041567 | -0.27994 | C | 3.53376  | -2.15982 | -1.67348 |
| H | -7.101   | 0.436336 | -1.04746 | H | 3.700233 | -1.11071 | -1.47252 |
| C | 2.263252 | -4.19256 | -1.43836 |   |          |          |          |

**(P,M,M)-TO6H**

|   | X        | Y        | Z        |   | X        | Y        | Z        |
|---|----------|----------|----------|---|----------|----------|----------|
| O | -4.53681 | 2.263407 | 0.531172 | C | -3.74368 | -2.40119 | -2.45637 |
| O | 4.309315 | 2.34401  | -0.00529 | H | -4.57906 | -2.06365 | -3.05893 |
| O | 0.256361 | -4.84046 | -0.66945 | C | -3.45898 | -3.77547 | -2.36277 |
| C | -5.03275 | 1.008795 | 0.784266 | H | -4.08641 | -4.49715 | -2.873   |
| C | -6.33662 | 0.742391 | 1.167914 | C | -2.34973 | -4.19325 | -1.66265 |
| H | -7.06715 | 1.537401 | 1.247216 | H | -2.06538 | -5.23755 | -1.63712 |
| C | -6.64131 | -0.58215 | 1.467212 | C | 2.379307 | 2.967248 | -1.07349 |
| H | -7.64619 | -0.84099 | 1.779859 | C | -1.52603 | -3.24756 | -1.01296 |
| C | -5.66016 | -1.58013 | 1.386496 | C | -0.24517 | -3.57886 | -0.51335 |
| H | -5.91888 | -2.60064 | 1.64372  | C | 0.710289 | -2.66407 | -0.09977 |
| C | -4.36213 | -1.29142 | 0.980635 | C | 0.292016 | -1.29361 | 0.120454 |
| H | -3.6251  | -2.07965 | 0.927223 | C | 1.190777 | -0.24815 | 0.549551 |
| C | -4.03096 | 0.030775 | 0.651769 | C | 0.906947 | 1.070284 | 0.116084 |
| C | -2.82993 | 0.761945 | 0.253163 | C | 2.071509 | 1.881599 | -0.15354 |
| C | -3.20432 | 2.090644 | 0.268805 | C | 3.28591  | 1.536435 | 0.410446 |
| C | -2.30536 | 3.179329 | 0.254078 | C | 3.459144 | 0.460834 | 1.31631  |
| C | -2.75478 | 4.508989 | 0.407059 | C | 4.594443 | 0.280783 | 2.130545 |
| H | -3.81946 | 4.702368 | 0.371189 | H | 5.416166 | 0.981793 | 2.047812 |
| C | -1.85598 | 5.521982 | 0.648685 | C | 4.630986 | -0.75338 | 3.04358  |
| H | -2.19851 | 6.543016 | 0.770667 | H | 5.49522  | -0.8817  | 3.684963 |
| C | -0.49495 | 5.207223 | 0.793396 | C | 3.532134 | -1.6221  | 3.163334 |
| H | 0.214818 | 5.98356  | 1.055167 | H | 3.545488 | -2.40722 | 3.910405 |
| C | -0.0439  | 3.914183 | 0.621576 | C | 2.432874 | -1.48668 | 2.338181 |
| H | 1.001894 | 3.718034 | 0.7828   | H | 1.594456 | -2.16225 | 2.445897 |
| C | -0.91369 | 2.852037 | 0.272312 | C | 2.370703 | -0.46042 | 1.369916 |
| C | -0.48638 | 1.467785 | 0.053667 | C | 1.605131 | -4.73724 | -0.45509 |
| C | -1.45381 | 0.428307 | -0.00656 | C | 1.970637 | -3.41509 | -0.13669 |
| C | -1.01771 | -0.92568 | -0.27984 | C | 3.345505 | -3.14136 | -0.04651 |
| C | -1.86212 | -1.86445 | -0.99967 | H | 3.707477 | -2.14112 | 0.128448 |
| C | -2.9673  | -1.4738  | -1.79393 | C | 4.259453 | -4.17673 | -0.20885 |
| H | -3.20084 | -0.42434 | -1.89777 | H | 5.318554 | -3.95705 | -0.14086 |

|   | X        | Y        | Z        |   | X        | Y        | Z        |
|---|----------|----------|----------|---|----------|----------|----------|
| C | 3.845033 | -5.49076 | -0.46101 | C | 3.735461 | 4.88781  | -2.58271 |
| H | 4.582283 | -6.27706 | -0.57357 | H | 4.242068 | 5.639088 | -3.17714 |
| C | 2.493829 | -5.78969 | -0.59781 | C | 2.363186 | 4.66542  | -2.77067 |
| H | 2.139585 | -6.78525 | -0.83318 | H | 1.828928 | 5.248112 | -3.512   |
| C | 3.758192 | 3.200948 | -0.92738 | C | 1.674673 | 3.714405 | -2.02614 |
| C | 4.461184 | 4.149482 | -1.65163 | H | 0.615806 | 3.556204 | -2.18151 |
| H | 5.523851 | 4.292014 | -1.50191 |   |          |          |          |

### TS-3

|   | X        | Y        | Z        |   | X        | Y        | Z        |
|---|----------|----------|----------|---|----------|----------|----------|
| O | 2.071009 | -4.55949 | 0.357562 | C | 5.217158 | 1.370967 | 1.822866 |
| O | -4.71722 | 0.433938 | 1.453318 | H | 6.181638 | 1.662634 | 2.2221   |
| O | 2.957092 | 3.798358 | -0.99202 | C | 4.582631 | 2.166779 | 0.891689 |
| C | 3.289827 | -3.97652 | 0.124043 | H | 5.020529 | 3.101955 | 0.564381 |
| C | 4.479452 | -4.67679 | 0.013537 | C | 3.314741 | 1.800024 | 0.397881 |
| H | 4.511964 | -5.74522 | 0.185097 | C | 2.50827  | 2.652234 | -0.39728 |
| C | 5.601016 | -3.94785 | -0.36882 | C | 1.148999 | 2.468963 | -0.5599  |
| H | 6.5536   | -4.45176 | -0.48336 | C | 0.538347 | 1.260299 | -0.08884 |
| C | 5.501262 | -2.57649 | -0.63867 | C | -0.87398 | 1.077022 | 0.168533 |
| H | 6.379249 | -2.0352  | -0.97142 | C | -1.45601 | -0.20352 | -0.05262 |
| C | 4.301268 | -1.89016 | -0.49026 | C | -2.93391 | -0.26786 | 0.169638 |
| H | 4.258917 | -0.8355  | -0.71676 | C | -3.41627 | 0.636014 | 1.103065 |
| C | 3.159229 | -2.58763 | -0.06529 | C | -2.77796 | 1.80674  | 1.573418 |
| C | 1.735878 | -2.30128 | 0.135588 | C | -3.39734 | 2.665487 | 2.503498 |
| C | 1.156356 | -3.54632 | 0.276165 | H | -4.36169 | 2.386259 | 2.907293 |
| C | -0.19574 | -3.81481 | -0.04404 | C | -2.78095 | 3.838397 | 2.877497 |
| C | -0.68192 | -5.12501 | -0.22444 | H | -3.25231 | 4.504523 | 3.590669 |
| H | -0.09604 | -5.95496 | 0.149884 | C | -1.52741 | 4.152324 | 2.332003 |
| C | -1.83771 | -5.34096 | -0.94715 | H | -1.01801 | 5.060218 | 2.63458  |
| H | -2.20728 | -6.34848 | -1.09846 | C | -0.91482 | 3.312019 | 1.423049 |
| C | -2.47534 | -4.25329 | -1.5615  | H | 0.064176 | 3.586736 | 1.071283 |
| H | -3.31667 | -4.42097 | -2.22376 | C | -1.52504 | 2.109237 | 0.986762 |
| C | -2.01852 | -2.96839 | -1.33779 | C | 1.854582 | 4.366617 | -1.59104 |
| H | -2.42614 | -2.13497 | -1.87491 | C | 0.701147 | 3.596688 | -1.35883 |
| C | -0.94212 | -2.68906 | -0.49355 | C | -0.51199 | 4.020786 | -1.91297 |
| C | -0.51503 | -1.3252  | -0.20276 | H | -1.4208  | 3.454659 | -1.75455 |
| C | 0.871542 | -1.13135 | 0.10283  | C | -0.52419 | 5.1873   | -2.6701  |
| C | 1.393716 | 0.199435 | 0.249314 | H | -1.45563 | 5.528548 | -3.10658 |
| C | 2.713887 | 0.558157 | 0.769663 | C | 0.644464 | 5.934312 | -2.87964 |
| C | 3.3701   | -0.19546 | 1.765962 | H | 0.600347 | 6.839894 | -3.47324 |
| H | 2.900588 | -1.0916  | 2.14627  | C | 1.863869 | 5.531032 | -2.33992 |
| C | 4.58465  | 0.206953 | 2.28863  | H | 2.777656 | 6.090379 | -2.49511 |
| H | 5.050893 | -0.38548 | 3.067259 | C | -5.1854  | -0.52795 | 0.615152 |

|   | X        | Y        | Z        |   | X        | Y        | Z        |
|---|----------|----------|----------|---|----------|----------|----------|
| C | -6.51765 | -0.91162 | 0.602825 | H | -6.35102 | -2.64891 | -2.29284 |
| H | -7.1974  | -0.53311 | 1.355692 | C | -4.67692 | -1.70805 | -1.36886 |
| C | -6.92959 | -1.73181 | -0.4353  | H | -4.06949 | -1.96348 | -2.21772 |
| H | -7.96194 | -2.0537  | -0.50119 | C | -4.17885 | -0.96987 | -0.27092 |
| C | -6.01308 | -2.08299 | -1.43238 |   |          |          |          |

**(M,M,M)-TO6H**

|   | X        | Y        | Z        |   | X        | Y        | Z        |
|---|----------|----------|----------|---|----------|----------|----------|
| O | -4.91472 | -0.3202  | 0.316593 | H | -1.78737 | 6.342652 | -2.0153  |
| O | 2.734884 | -4.09569 | 0.317691 | C | -0.30587 | 5.107743 | -1.08688 |
| O | 2.180137 | 4.416287 | 0.31631  | H | 0.397005 | 5.9129   | -0.912   |
| C | -4.83989 | 0.939323 | 0.857745 | C | 0.051014 | 3.799834 | -0.70331 |
| C | -5.88265 | 1.578752 | 1.507144 | C | 1.311735 | 3.469413 | -0.14999 |
| H | -6.85728 | 1.114275 | 1.586342 | C | 1.787989 | 2.182256 | -0.00142 |
| C | -5.60302 | 2.823714 | 2.062507 | C | 0.936433 | 1.066861 | -0.36554 |
| H | -6.38446 | 3.362803 | 2.585063 | C | 1.396039 | -0.28977 | -0.49465 |
| C | -4.31933 | 3.379288 | 1.96803  | C | 0.455691 | -1.34467 | -0.36571 |
| H | -4.12308 | 4.341867 | 2.4256   | C | 0.995971 | -2.63957 | -0.00084 |
| C | -3.29093 | 2.724665 | 1.299557 | C | 2.348811 | -2.87067 | -0.14931 |
| H | -2.31031 | 3.174441 | 1.244886 | C | 3.26511  | -1.94425 | -0.70338 |
| C | -3.5486  | 1.478427 | 0.710129 | C | 4.576283 | -2.28928 | -1.08661 |
| C | -2.78406 | 0.457215 | -0.00147 | H | 4.922254 | -3.3004  | -0.91093 |
| C | -3.66074 | -0.59858 | -0.15033 | C | 5.382272 | -1.35815 | -1.70672 |
| C | -3.31671 | -1.85542 | -0.70434 | H | 6.386444 | -1.62434 | -2.01554 |
| C | -4.27104 | -2.81821 | -1.08809 | C | 4.879512 | -0.07376 | -1.97141 |
| H | -5.31973 | -2.61226 | -0.91266 | H | 5.489658 | 0.644652 | -2.50652 |
| C | -3.86762 | -3.98163 | -1.70853 | C | 3.609095 | 0.286158 | -1.56564 |
| H | -4.60025 | -4.71801 | -2.01769 | H | 3.243985 | 1.274747 | -1.80293 |
| C | -2.50399 | -4.18831 | -1.97332 | C | 2.76871  | -0.61952 | -0.87854 |
| H | -2.18689 | -5.07553 | -2.50908 | C | 3.233877 | 3.721812 | 0.85674  |
| C | -1.55708 | -3.26824 | -1.56702 | C | 3.055194 | 2.333968 | 0.709111 |
| H | -0.51839 | -3.44611 | -1.80454 | C | 4.006235 | 1.487787 | 1.297729 |
| C | -1.92119 | -2.08804 | -0.87921 | H | 3.905725 | 0.413646 | 1.242784 |
| C | -0.94912 | -1.06441 | -0.49485 | C | 5.087585 | 2.051193 | 1.965743 |
| C | -1.39237 | 0.27746  | -0.36575 | H | 5.823407 | 1.399982 | 2.422839 |
| C | -0.44735 | 1.353932 | -0.49427 | C | 5.248127 | 3.440709 | 2.060327 |
| C | -0.84831 | 2.707588 | -0.87755 | H | 6.105855 | 3.847961 | 2.582597 |
|   | X        | Y        | Z        | C | 4.309339 | 4.305243 | 1.505579 |
| H | -2.72712 | 2.171824 | -1.80031 | H | 4.394216 | 5.381557 | 1.584776 |
| C | -2.37702 | 4.262486 | -1.96975 | C | 1.606645 | -4.66096 | 0.858499 |
| H | -3.30455 | 4.431608 | -2.50437 | C | 1.57453  | -5.88376 | 1.507859 |
| C | -1.51568 | 5.340046 | -1.70621 | H | 2.46438  | -6.49514 | 1.587325 |
|   |          |          |          | C | 0.356471 | -6.2646  | 2.062674 |

|   |          |          |          |   |          |          |          |
|---|----------|----------|----------|---|----------|----------|----------|
| H | 0.280471 | -7.21087 | 2.585274 | H | -1.59446 | -3.58941 | 1.243821 |
| C | -0.76681 | -5.43116 | 1.967565 | C | 0.493914 | -3.81258 | 0.710331 |
| H | -1.6987  | -5.7428  | 2.424633 | C | -2.05337 | 2.982421 | -1.56376 |
| C | -0.71433 | -4.21326 | 1.298997 |   |          |          |          |

## 6. NMR and HRMS Spectra

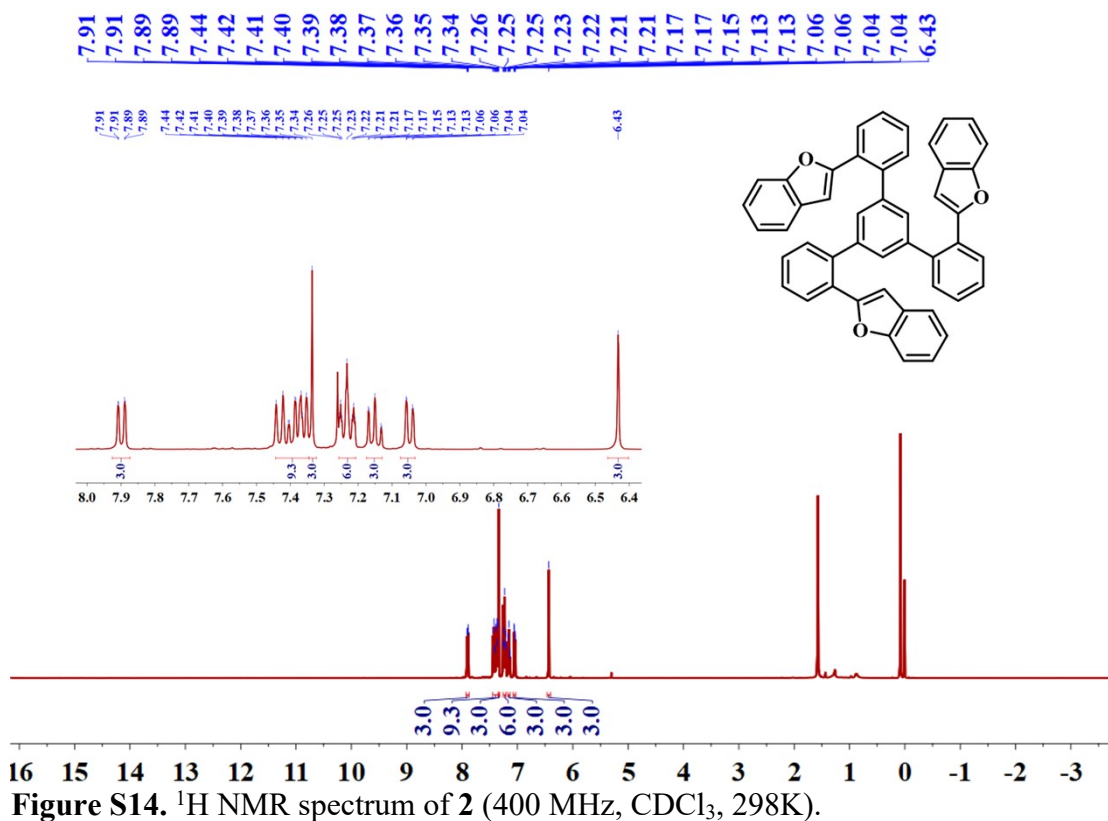

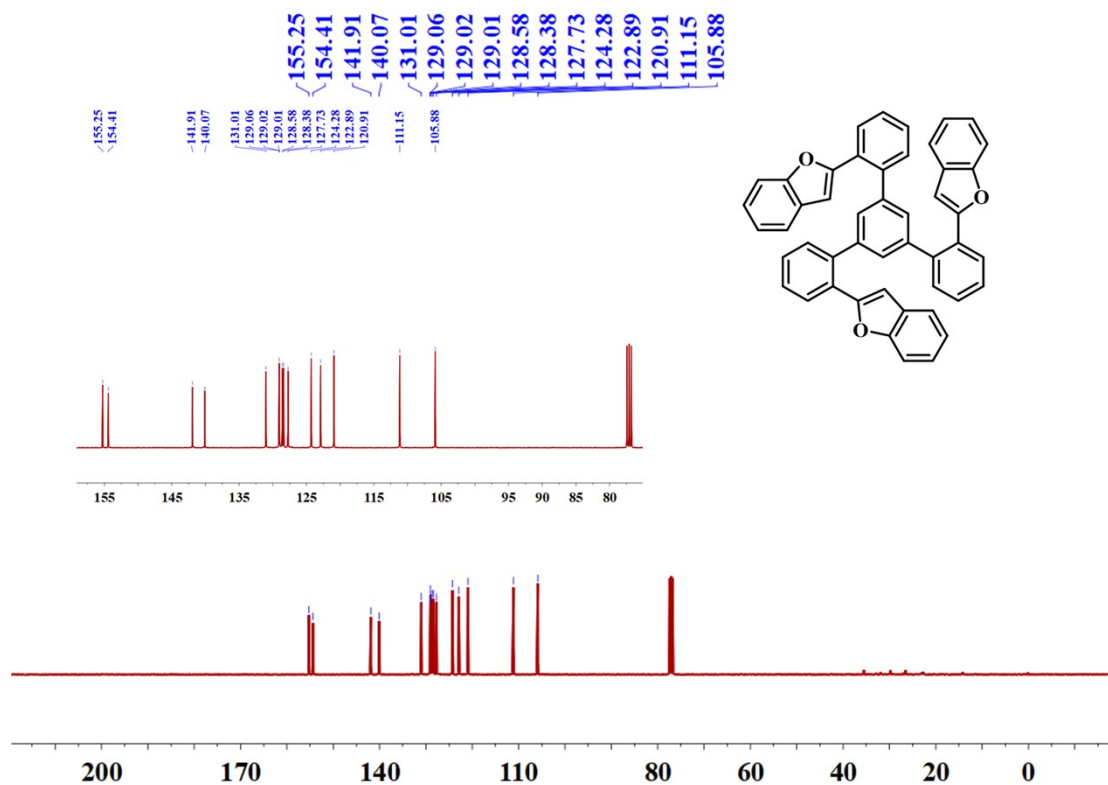

Figure S15. <sup>13</sup>C NMR spectrum of **2** (100 MHz, CDCl<sub>3</sub>, 298K).

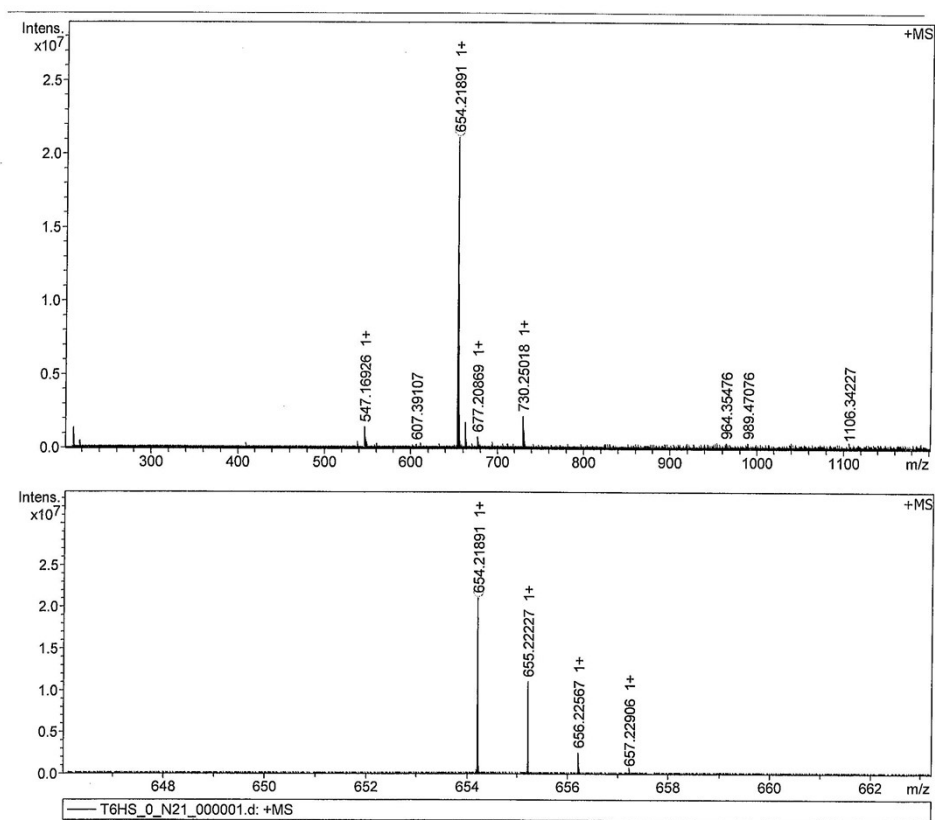

| Meas. m/z  | # | Ion Formula                                    | Score  | m/z        | err [ppm] | Mean err [ppm] | mSigma | rdb  | e <sup>-</sup> Conf | N-Rule |
|------------|---|------------------------------------------------|--------|------------|-----------|----------------|--------|------|---------------------|--------|
| 654.218913 | 1 | C <sub>48</sub> H <sub>30</sub> O <sub>3</sub> | 100.00 | 654.218946 | -0.1      | 0.0            | 7.7    | 34.0 | odd                 | ok     |

Figure S16. HRMS (MALDI-FT) spectrum of **2**.

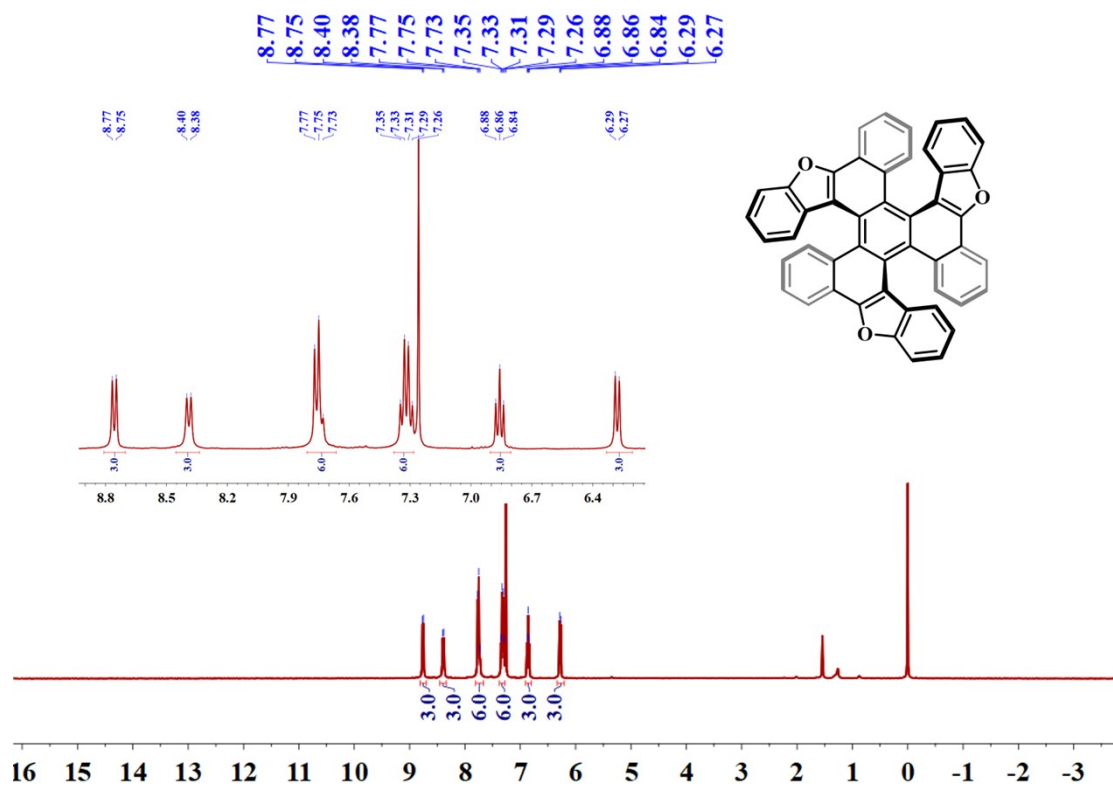

Figure S17.  $^1\text{H}$  NMR spectrum of TO6H (400 MHz,  $\text{CDCl}_3$ , 298K).

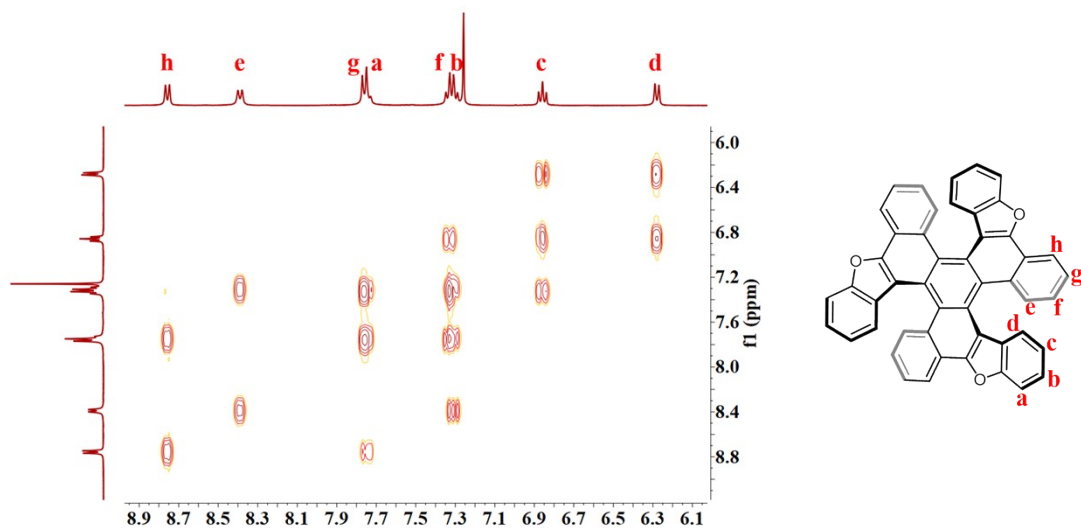

Figure S18. 2D  $^1\text{H}$ - $^1\text{H}$  COSY NMR spectrum of TO6H (400MHz,  $\text{CDCl}_3$ , 298K).

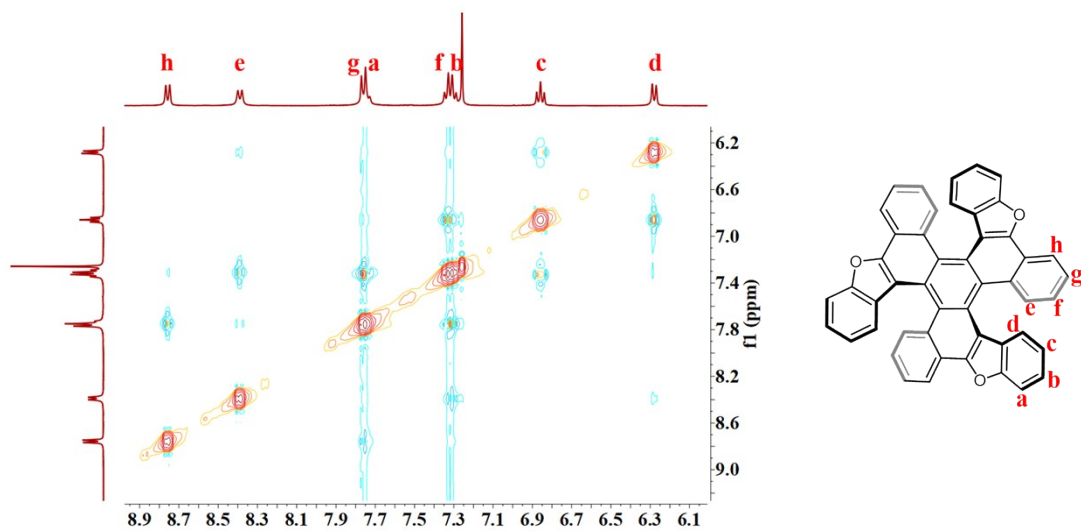

Figure S19. 2D  $^1\text{H}$ - $^1\text{H}$  NOESY NMR spectrum of TO6H (400MHz,  $\text{CDCl}_3$ , 298K).

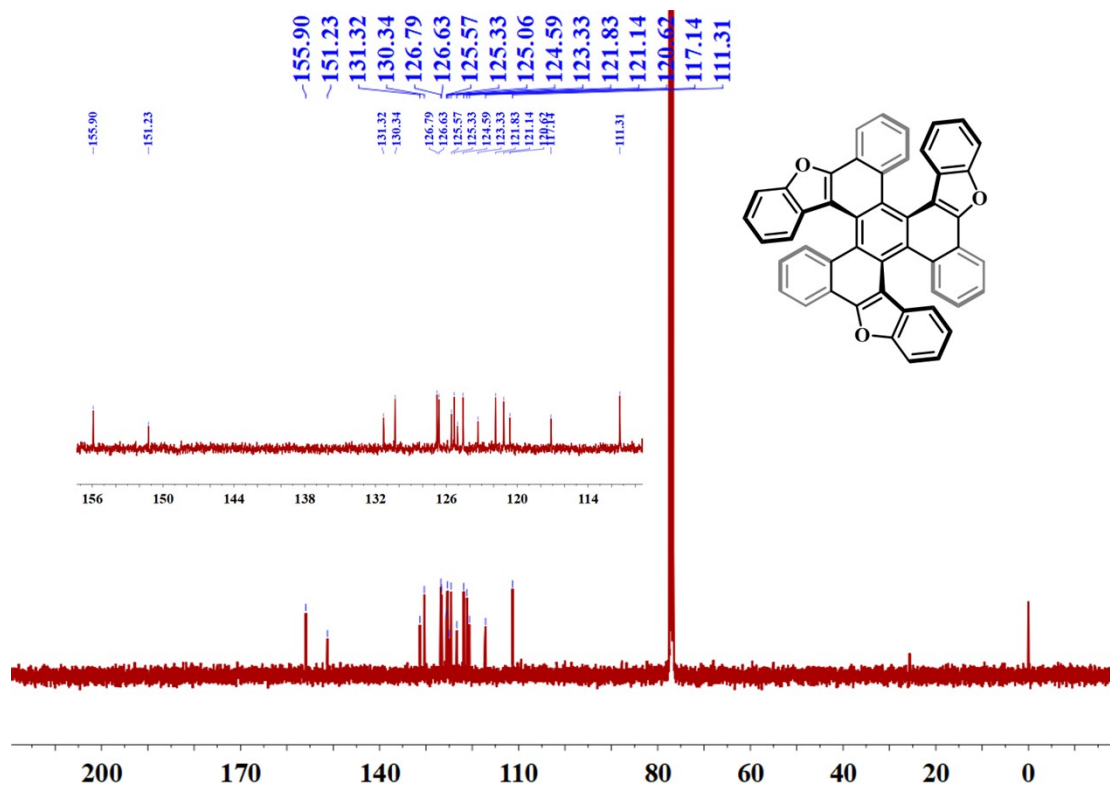

Figure S20.  $^{13}\text{C}$  NMR spectrum of TO6H (100 MHz,  $\text{CDCl}_3$ , 298K).

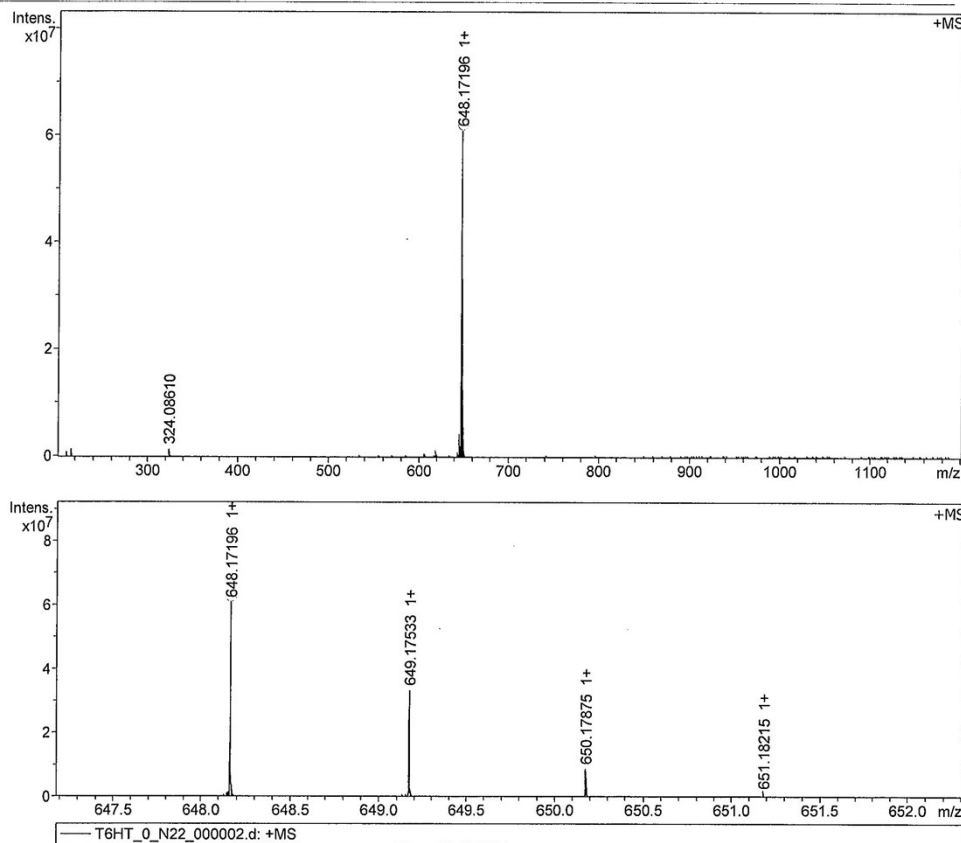

| Meas. m/z  | # | Ion Formula | Score  | m/z        | err [ppm] | Mean err [ppm] | mSigma | rdb  | e <sup>-</sup> Conf | N-Rule |
|------------|---|-------------|--------|------------|-----------|----------------|--------|------|---------------------|--------|
| 648.171956 | 1 | C48H24O3    | 100.00 | 648.171996 | -0.1      | 0.0            | 11.9   | 37.0 | odd                 | ok     |

**Figure S21.** HRMS (MALDI-FT) spectrum of TO6H.

## References:

- 1 X. Feng, J. Wu, V. Enkelmann, K. Müllen, *Org. Lett.*, 2006, **8**, 1145-1148.
- 2 C. Duan, J. Zhang, J. Xiang, X. Yang, X. Gao, *Angew. Chem. Int. Ed.*, 2022, **61**, e202201494.
- 3 P. Ravat, *Chem. Eur. J.*, 2021, **27**, 3957-3967.
- 4 M. J. Frisch, G. W. Trucks, H. B. Schlegel, G. E. Scuseria, M. A. Robb, J. R. Cheeseman, G. Scalmani, V. Barone, B. Mennucci, G. A. Petersson, H. Nakatsuji, M. Caricato, X. Li, H. P. Hratchian, A. F. Izmaylov, J. Bloino, G. Zheng, J. L. Sonnenberg, M. Hada, M. Ehara, K. Toyota, R. Fukuda, J. Hasegawa, M. Ishida, T. Nakajima, Y. Honda, O. Kitao, H. Nakai, T. Vreven, J. A. Montgomery Jr, J. E. Peralta, F. Ogliaro, M. Bearpark, J. J. Heyd, E. Brothers, K. N. Kudin, V. N. Staroverov, T. Keith, R. Kobayashi, J. Normand, K. Raghavachari, A. Rendell, J. C. Burant, S. S. Iyengar, J. Tomasi, M. Cossi, N. Rega, J. M. Millam, M. Klene, J. E. Knox, J. B. Cross, V. Bakken, C. Adamo, J. Jaramillo, R. Gomperts, R. E. Stratmann, O. Yazyev, A. J. Austin, R. Cammi, C. Pomelli, J. W. Ochterski, R. L. Martin, K. Morokuma, V. G. Zakrzewski, G. A. Voth, P. Salvador, J. J. Dannenberg, S. Dapprich, A. D. Daniels, O. Farkas, J. B. Foresman, J. V. Ortiz, J. Cioslowski and D. J. Fox, *Gaussian 09, Revision E.01*, Gaussian, Inc., Wallingford, CT, 2013.
